# Supplementary material
Source: publisher figshare collection journal article supplement (https://acs.figshare.com/ndownloader/files/5076685)

## SUPPORTING INFORMATION

A windmill-shaped hexacopper(II) molecule built up by template self-assembly of diaqua-tetra( $\mu_2$ -N3,N9-adeninato)dicopper(II) and aqua(oxydiacetato)copper(II).

Josefa María González-Pérez<sup>\*,†</sup>, Carolina Alarcón-Payer<sup>†</sup>, Alfonso Castiñeiras<sup>‡</sup>, Tiziana Pivetta<sup>§</sup>, Luis Lezama<sup>§§</sup>, Duane Choquesillo-Lazarte<sup>‡</sup>, Guido Crisponi<sup>§</sup> and Juan Nicolás-Gutiérrez<sup>\*,†</sup>.

Department of Inorganic Chemistry, Faculty of Pharmacy, University of Granada, E-18071 Granada, Spain. Department of Inorganic Chemistry, Faculty of Pharmacy, University of Santiago de Compostela, E-15706 Santiago de Compostela, Spain. Department of Chemical Sciences, University of Cagliari, I-09042 Monserrato-Cagliari, Italy and Department of Inorganic Chemistry, University of Basque country, E-4808 Bilbao, Spain.

\*To whom correspondence should be addressed: E-mail: jmgp@ugr.es (J.M.G.-P.), jniclos@ugr.es. Fax: +34-958246219

S1A. Thermogravimetric analysis, with FT-IR spectral identification of evolved gasses.

Unidad de TG, DSC, NIR.  
Centro de Instrumentación Científica.  
Universidad de Granada.

File Name: T2100156.D20 C-286  
Detector Type: Shimadzu TGA-50H  
Acquisition Date: 10/05/04  
Acquisition Time: 09:51:44  
Sample Name: C-286  
Weight: 7.081[mg]  
Cell: Alumina  
Atmosphere: Air  
Rate Flow: 100.0[ml/min]  
Operator: MASP

| Temp Program |           |           |  |
|--------------|-----------|-----------|--|
| Rate         | Hold Temp | Hold Time |  |
| [C/min]      | [C]       | [min]     |  |
| 10.0         | 950.0     | 0.0       |  |

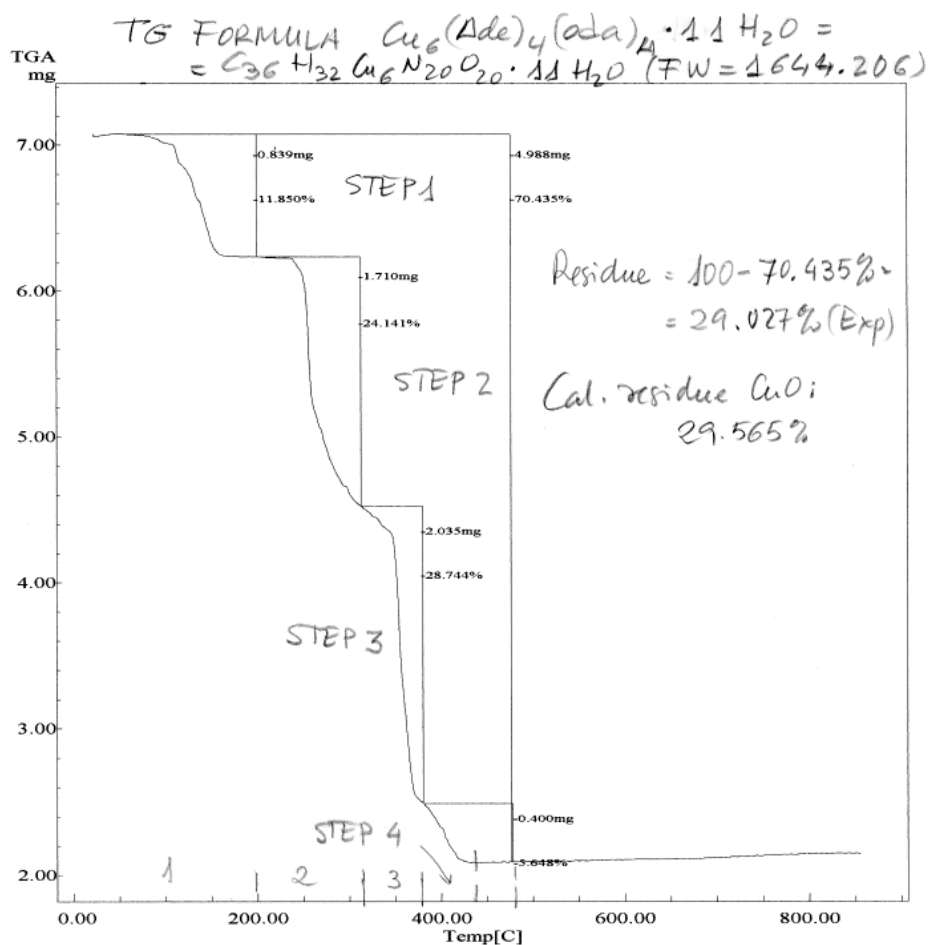

S1B. FT-IR spectra of the gasses (standards). They are used for the identification of gasses in the 22 IR spectra recorded during the experience (see S1C).

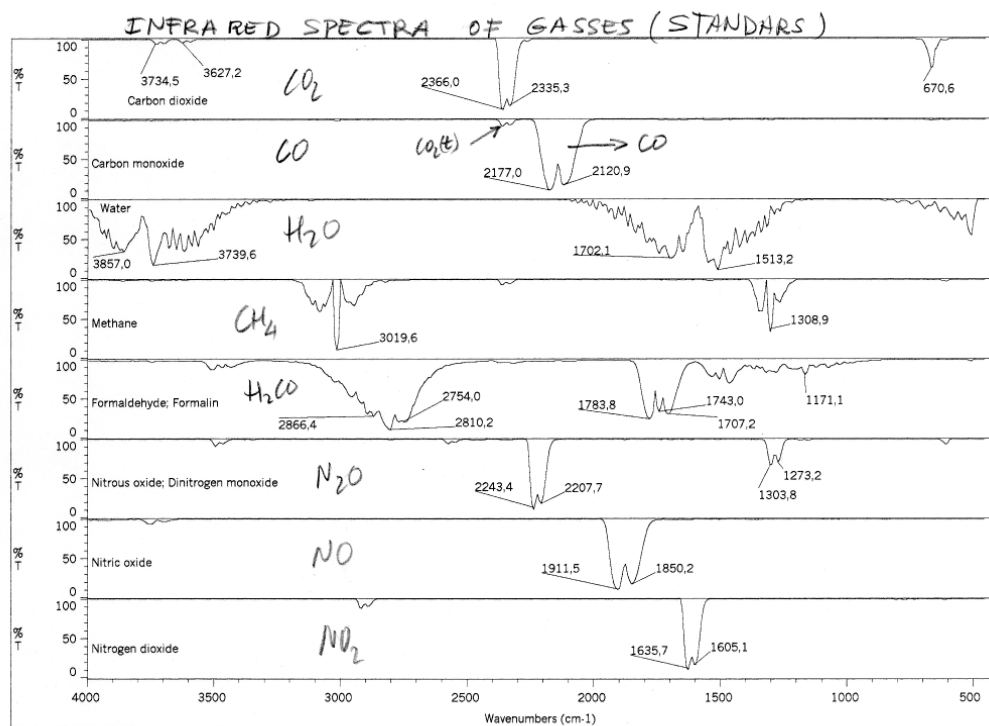

S1C. FT-IR spectra recorded during the TG analysis of compound 1-o. On the right-hand is indicated the 5 or 6 spectra corresponding to each step. Four of these spectra (one per step) were selected as is shown in S1E.

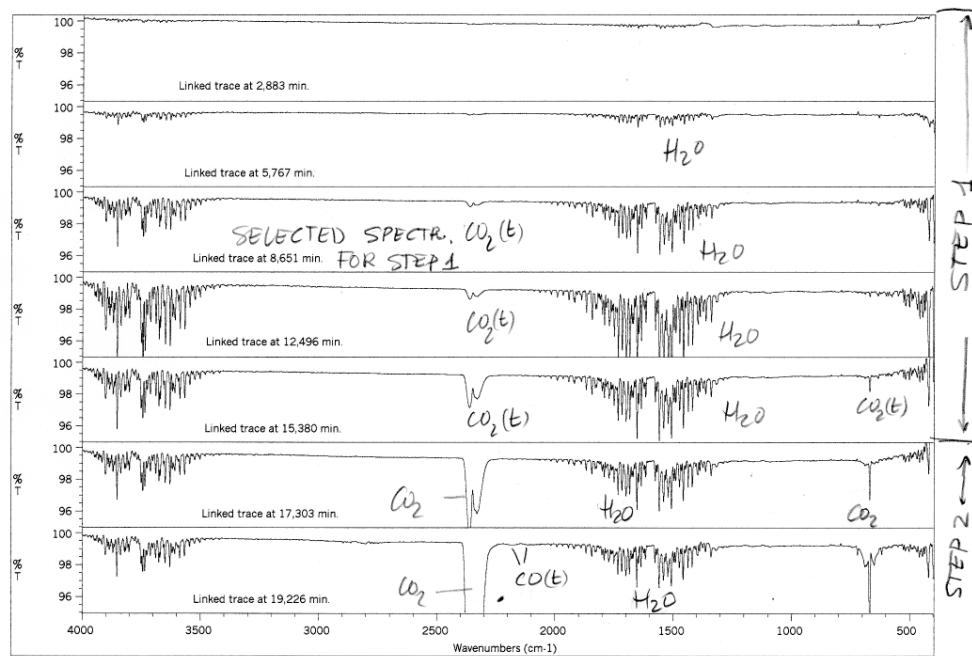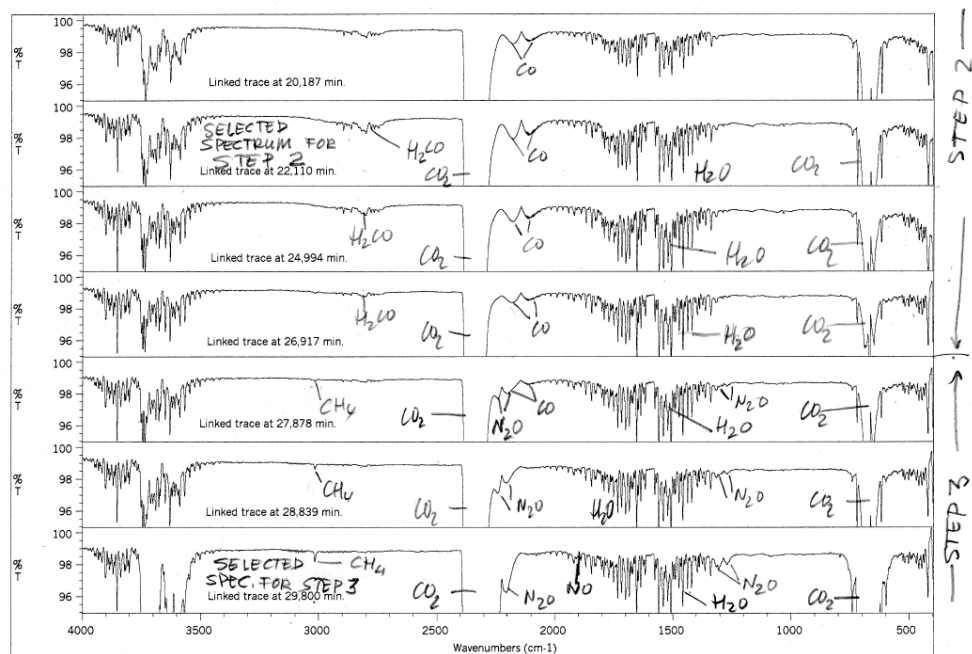

S1C (cont). FT-IR spectra recorded during the TG analysis of compound 1-o. On the right-hand is indicated the 5 or 6 spectra corresponding to each step. Four of these spectra (one per step) were selected as is shown in S1E.

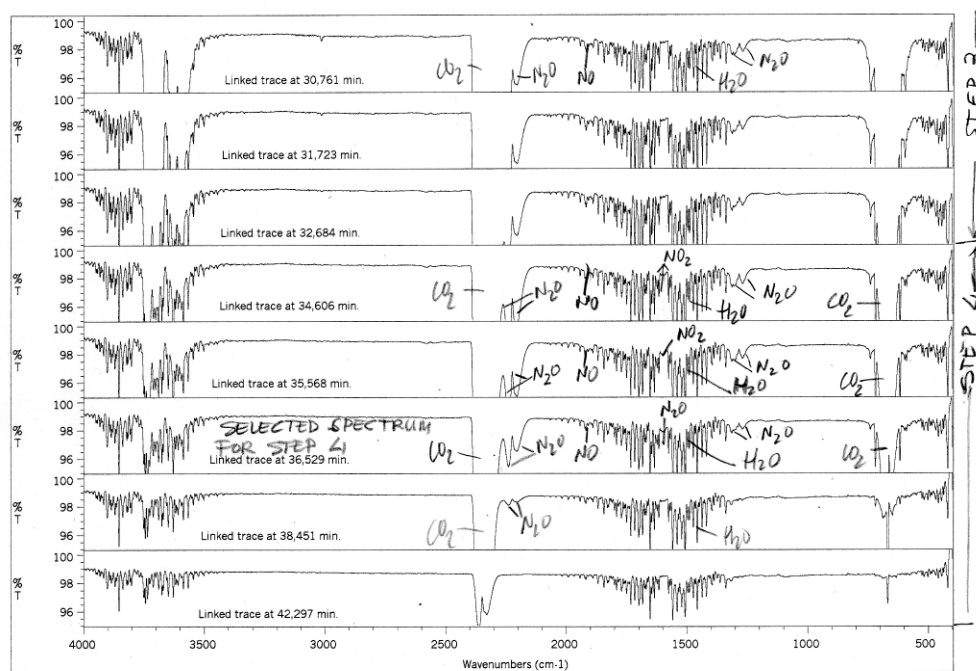

S1D. Summary of the Thermogravimetric experience for compound **1-o**.

| Step    | temp (°C)  | time (min) | IR N° | Weight loss % |         | Gasses or residue                                      |
|---------|------------|------------|-------|---------------|---------|--------------------------------------------------------|
|         |            |            |       | Exp.          | Calcd*. |                                                        |
| 1       | r.t. – 200 | 2 - 15     | 5     | 11.850        | 12.053  | (11)H <sub>2</sub> O,<br>CO <sub>2</sub> (t)<br>***    |
| 2       | 200 - 315  | 15 - 27    | 6     | 24.141        | -       | H <sub>2</sub> CO,<br>CO<br>***                        |
| 3       | 315 - 380  | 27 - 33    | 6     | 28.744        | -       | CO,<br>N <sub>2</sub> O, NO<br>***                     |
| 4       | 380 - 435  | 33 - 44    | 5     | 5.648         | -       | N <sub>2</sub> O,<br>NO,<br>NO <sub>2</sub> (t)<br>*** |
| Residue | 480        | -          | -     | 29.565        | 29.027  | CuO                                                    |

\* Calculated values for C<sub>36</sub>H<sub>32</sub>Cu<sub>6</sub>N<sub>20</sub>O<sub>20</sub>·11H<sub>2</sub>O (FW 1644.206)

\*\* t = trace amounts

\*\*\* In addition to H<sub>2</sub>O and CO<sub>2</sub>

S1E. Selected FT-IR spectra of gasses for each step.

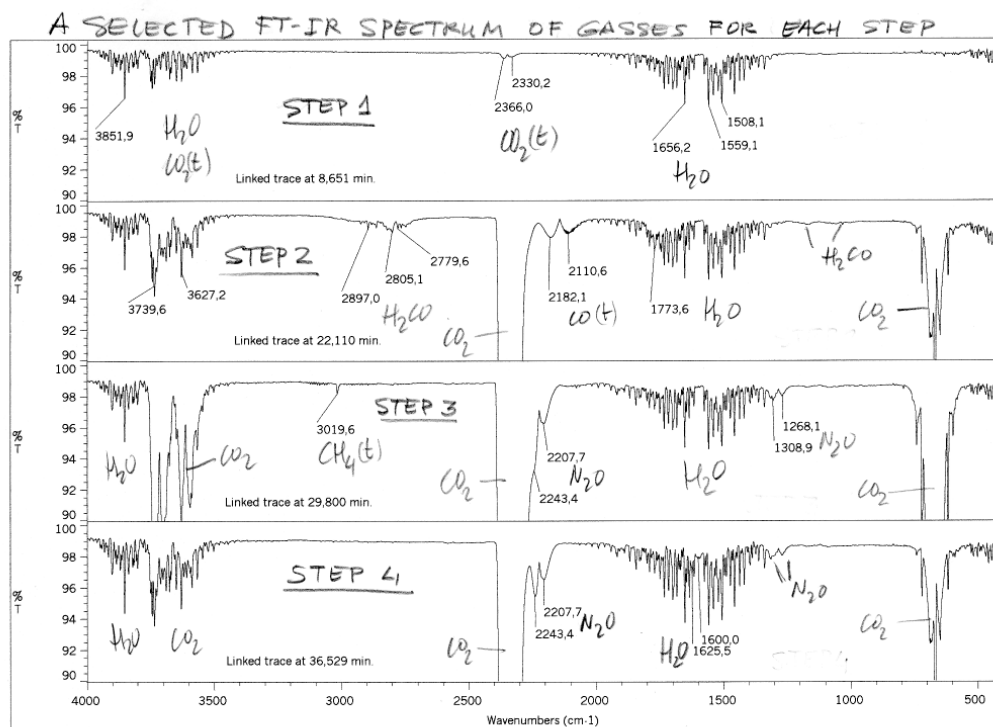

S2. FT-IR spectrum of compound **1-o** in solid state (KBr disc).

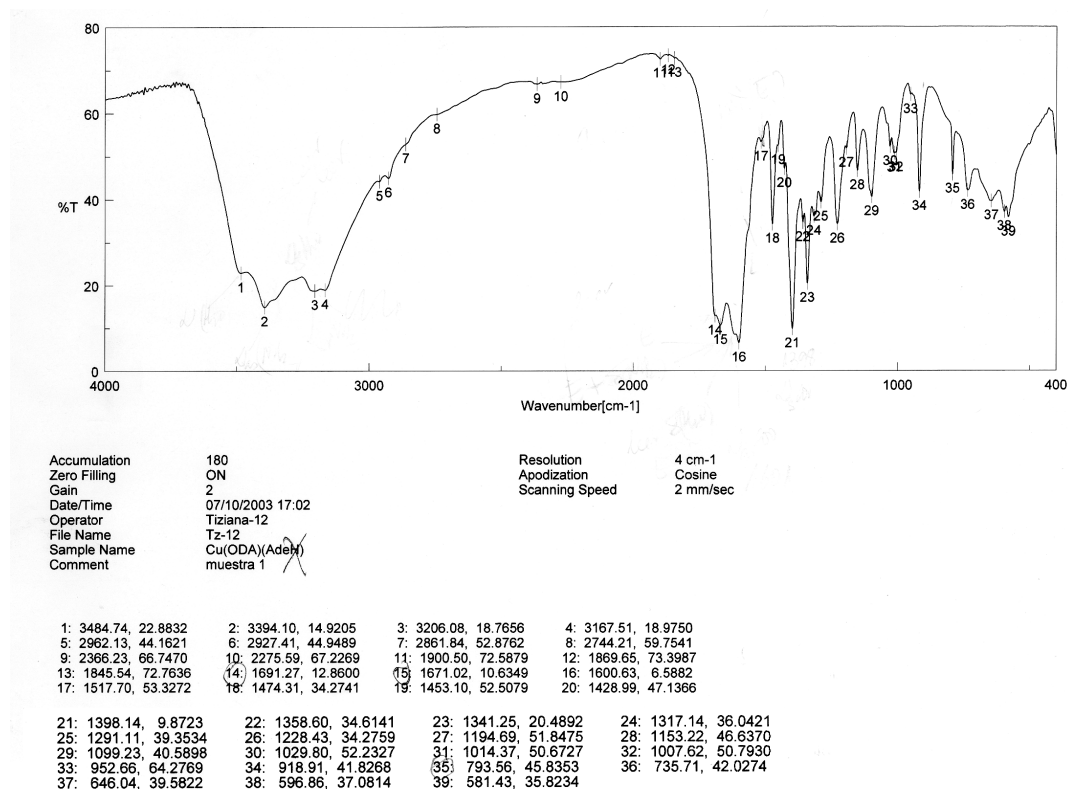

Wavenumbers in  $\text{cm}^{-1}$  (the number of the band is indicated in brackets).

$\text{H}_2\text{O}$   $\nu_{\text{as}}$  3485 [1]  $\nu_{\text{s}} \sim 3280$   $\delta$  1625

Ade  $\nu_{\text{as}}(\text{NH}_2)$  3390 [2], 3350  $\nu_{\text{s}}(\text{NH}_2)$  3206 [3], 3168 [4]  $\delta(\text{NH}_2)$  1671 [15]  
 $\pi(\text{C-H})$  794 [35]

oda  $\nu_{\text{as}}(\text{COO})$  1601 [16]  $\nu_{\text{s}}(\text{COO})$  1398 [21]

S3. Electronic (reflectance) spectrum of compound **1-o**.

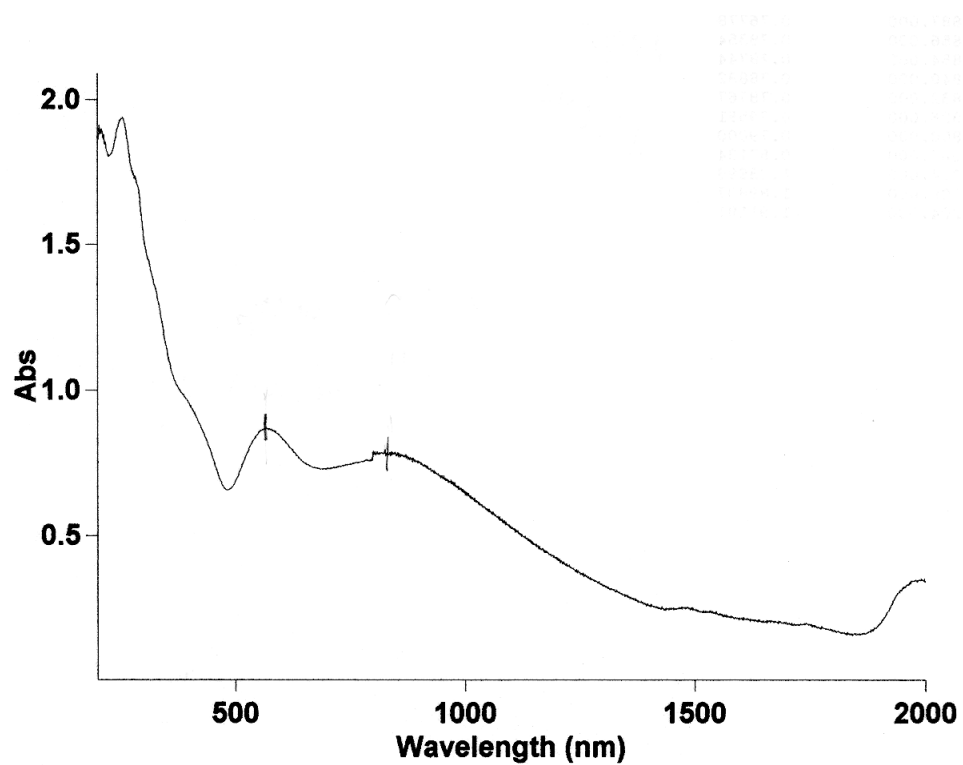

|        |        |                        |
|--------|--------|------------------------|
| Maxima | 840 nm | 11900 cm <sup>-1</sup> |
|        | 567 nm | 17640 cm <sup>-1</sup> |



S4. X-band ESR spectrum of compound **1-o** at room temperature. Apparent  $g_{iso} = 2.137$ .

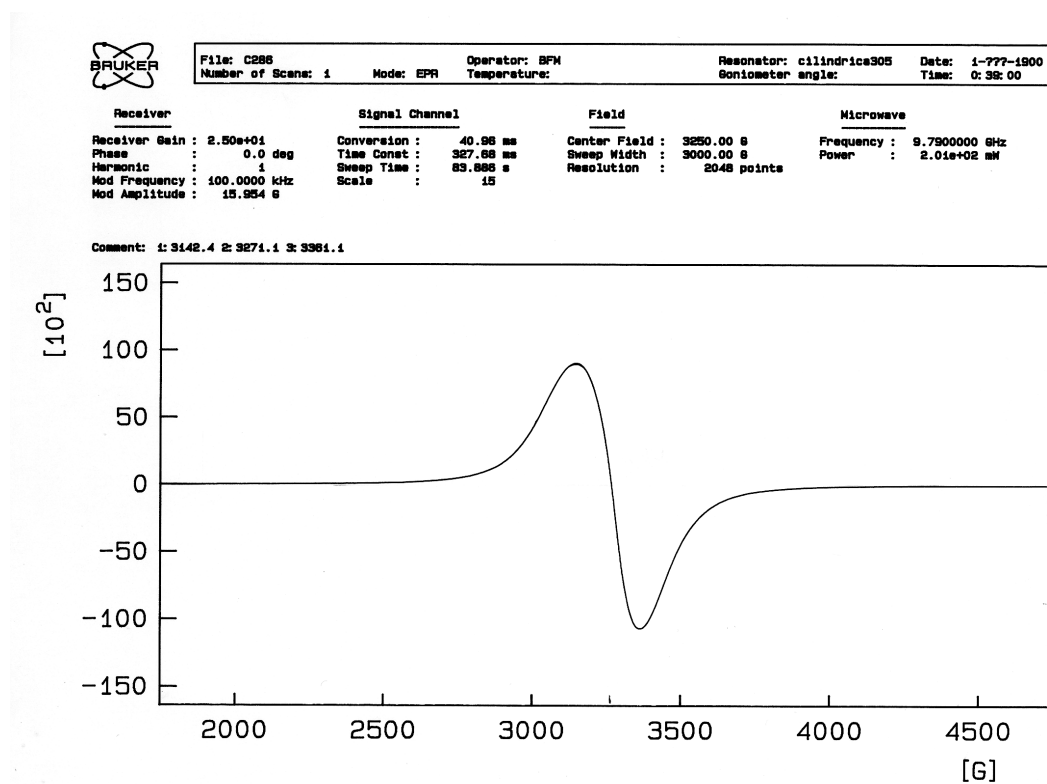

Supplement: Supplementary file 1 [file 5076685]
